# Supplementary material for: The human blood DNA methylome identifies crucial role of β-catenin in the pathogenesis of Kawasaki disease
Source: PubMed Central journal article supplement (PMC6033340; doi:10.18632/oncotarget.25305), 2018-06-19
Supplement: oncotarget-09-28337-s001.pdf [file oncotarget-09-28337-s001.pdf]

## The human blood DNA methylome identifies crucial role of $\beta$ -catenin in the pathogenesis of Kawasaki disease

### SUPPLEMENTARY MATERIALS

**Supplementary Table 1: Expression validation of network-based genes through targeted RNA-Seq analysis**

| Ensembl ID      | Gene symbol | Description                                                               | Mean reads | Ratio  | Adjusted p-value |
|-----------------|-------------|---------------------------------------------------------------------------|------------|--------|------------------|
| ENSG00000168036 | CTNNB1      | catenin (cadherin-associated protein), beta 1, 88kDa                      | 100.67     | 0.3724 | 8.37E-08         |
| ENSG00000131196 | NFATC1      | nuclear factor of activated T-cells, cytoplasmic, calcineurin-dependent 1 | 76.5       | 0.4297 | 7.53E-07         |
| ENSG00000134954 | ETS1        | v-ets erythroblastosis virus E26 oncogene homolog 1                       | 141.1      | 0.2708 | 4.34E-12         |
| ENSG00000172819 | RARG        | retinoic acid receptor, gamma                                             | 184.7      | 0.3274 | 1.62E-04         |
| ENSG00000101224 | CDC25B      | cell division cycle 25B                                                   | 49400.6    | 0.4732 | 2.03E-18         |
| ENSG00000020633 | RUNX3       | Runt-related transcription factor 3                                       | 130.5      | 0.2617 | 3.02E-07         |
| ENSG00000198821 | CD247       | CD247 molecule                                                            | 1273.9     | 0.6621 | 4.28E-13         |
| ENSG00000226979 | LTA         | lymphotoxin alpha (TNF superfamily, member 1)                             | 426        | 0.6309 | 3.57E-11         |
| ENSG00000186265 | BTLA        | B and T lymphocyte associated                                             | 1065.8     | 0.3804 | 0.000725         |
| ENSG00000188389 | PDCD1       | programmed cell death 1                                                   | 1483.1     | 0.4764 | 1.44E-06         |
| ENSG00000165025 | SYK         | spleen associated tyrosine kinase                                         | N.A.       |        |                  |

N.A.: not available.

**Supplementary Table 2: Hypermethylated CpG loci with source sequences selected using network-based enrichment analysis.**

See Supplementary File 1

**Supplementary Table 3: Probe data of 11 targeted genes with hypermethylated CpG loci selected using network-based enrichment analysis predesigned for RNA-Seq.**

See Supplementary File 2
