# Supplementary material for: The human blood DNA methylome identifies crucial role of β-catenin in the pathogenesis of Kawasaki disease
Source: PubMed Central journal article supplement (PMC6033340; doi:10.18632/oncotarget.25305), 2018-06-19
Supplement: oncotarget-09-28337-s002.pdf [file oncotarget-09-28337-s002.pdf]

**Supplementary Table 2.** Hypermethylated CpG loci with source sequences selected using network-based enrichment analysis.

| CpG loci ID | Gene<br>Symbol | Chr | Source Sequence                                    | Coordinate in<br>Build 36 | Genomic<br>Location | Strand | Functional<br>Location   | Δ-Beta  | Adjusted<br>p-value |
|-------------|----------------|-----|----------------------------------------------------|---------------------------|---------------------|--------|--------------------------|---------|---------------------|
| cg24157392  | BTLA           | 3   | CGGTAAGCAAATGTAACAGCTTGGTTTCATCTACGATTACCCACTTCGTA | 113700663                 | 3:113700663         | F      | Body                     | 0.25195 | 1.60E-08            |
| cg09032544  | CD247          | 1   | CGGAAAATGTCAGCCAGGCCATGTTTCGTGCTGCGACGTTCTAGTCCCTT | 165753919                 | 1:165753919         | R      | Body                     | 0.31832 | 7.70E-04            |
| cg07786657  |                | 1   | TCCCCTACACATACACAAGAGTTTCTAGAAGTTCCCTGCCGTCGACACG  | 165754257                 | 1:165754257         | R      | Body                     | 0.36159 | 5.60E-05            |
| cg14165142  | CDC25B         | 20  | AGAGGGTGGGGCCCTCTACGGAGATGAGATCTTACCTATGTAAAACCACG | 3726655                   | 20:3726655          | R      | Body                     | 0.25253 | 1.10E-08            |
| cg02737268  |                | 20  | CCGTGTTACAGGAGACCCTGCCACGCGGAGCTTTTGTGCATCTACGCG   | 3728182                   | 20:3728182          | F      | Body                     | 0.42308 | 1.90E-09            |
| cg15421087  | CTNNB1         | 3   | CGGCGGGGGACTACTTTCCACCGCCCCCTCGCGCCCCGCCCTTGTCCT   | 41215859                  | 3:41215859          | F      | TSS200                   | 0.25553 | 3.20E-05            |
| cg03295554  | ETS1           | 11  | CGGCTGATCCAGAACCAGTTTATGACTCACAGATGTTGATTTACTGGTAT | 127900660                 | 11:127900660        | F      | Body                     | 0.26371 | 1.00E-05            |
| cg26404422  |                | 11  | CGAAGTCACCAGCCAGTAAAAACCACTGCAAAGAAGGGAGAAGAAGCTGC | 127872220                 | 11:127872220        | F      | Body                     | 0.26570 | 3.40E-04            |
| cg26348243  | LTA            | 6   | CGCGGCGGAAGACAGACCTCCCGCCCTGGGAGAGAGACCCCCGACCCC   | 31648440                  | 6:31648440          | R      | 5'UTR                    | 0.28315 | 7.60E-04            |
| cg14441276  |                | 6   | CTCAGCCAAGGGTGCAGAGATGTTATATATGATTGCTCTTCAGGGAACCG | 31647714                  | 6:31647714          | R      | TSS1500;TSS200           | 0.25889 | 2.40E-06            |
| cg02402436  |                | 6   | GATGGGGCAGGAGAGCCTCACCTGCTGTGCGGAGCCCCGGGGCCGGACG  | 31648030                  | 6:31648030          | F      | TSS200;1stExo<br>n;5'UTR | 0.26393 | 1.70E-09            |
| cg21999229  |                | 6   | CGCTGCCACTGCCGCTTCTCTATAAAGGGACCTGAGCGTCCGGGCCAG   | 31647993                  | 6:31647993          | F      | TSS200;1stExo<br>n;5'UTR | 0.26700 | 1.50E-03            |
| cg16219283  |                | 6   | GCTCAGGTCCTTTATAGAGGAAGCGGCAGTGGCAGCGTGGCAGGCAGCG  | 31647981                  | 6:31647981          | F      | TSS200;1stExo<br>n;5'UTR | 0.27092 | 9.00E-09            |
| cg14597739  |                | 6   | CGCCCCGCTGCCTGCCACGCTGCCACTGCCGCTTCTCTATAAAGGGACCT | 31647977                  | 6:31647977          | F      | TSS200;1stExo            | 0.28225 | 2.50E-05            |

|            |        |    |                                                     |           |             |   |                          |         |          |
|------------|--------|----|-----------------------------------------------------|-----------|-------------|---|--------------------------|---------|----------|
| cg17169196 |        | 6  | TGTGCGGAGCCCCTGGGCCCGGACGCTCAGGTCCCTTTATAGAGGAAGCG  | 31648005  | 6:31648005  | F | n;5'UTR<br>TSS200;1stExo | 0.28398 | 6.90E-12 |
| cg09621572 |        | 6  | CGGGCCCCAGCCCCGACCTAGAACCCGCCCGCTGCCTGCCACGCTGCCAC  | 31647952  | 6:31647952  | F | n;5'UTR<br>TSS200;1stExo | 0.33790 | 3.70E-08 |
| cg14437551 |        | 6  | AGAGGAAGCGGCAGTGGCAGCGTGGCAGGCAGCGGGCGGGTTCTAGGTCCG | 31647965  | 6:31647965  | F | n;5'UTR<br>TSS200;1stExo | 0.36865 | 5.10E-06 |
| cg22324981 | NFATC1 | 18 | CGCCTACGGCTTGTTTACGCACAGCTAGTGAGAGCTTGCCTGGCCCCAGC  | 75384481  | 18:75384481 | F | Body                     | 0.30353 | 4.00E-10 |
| cg16308790 |        | 18 | GCTTCAGCTCCCCTGGGGCAGCTCTGATGCGGGGCAAAGGCAGGAAGACG  | 75326961  | 18:75326961 | R | Body                     | 0.28664 | 4.50E-06 |
| cg03889044 | PDCD1  | 2  | ATGCTCTTTTTCCACTGTTTCGGTGCCTTAATGTTTTCCCTTCAGAGCCG  | 242450772 | 2:242450772 | F | TSS1500                  | 0.26858 | 3.10E-10 |
| cg17322655 |        | 2  | TGGCCGCGCCTCGCAGACATCATCTTTGATGCTCTTTTTCCACTGTTTCG  | 242450800 | 2:242450800 | F | TSS1500                  | 0.27499 | 1.90E-08 |
| cg20805133 |        | 2  | CGAGAGCTTCCTCGCCGTGGCCGCGCCTCGCAGACATCATCTTTGATGCT  | 242450865 | 2:242450865 | R | TSS1500                  | 0.36842 | 6.60E-05 |
| cg09993145 | RUNX3  | 1  | CGCCCACTGCAACCGCTTTCAGTTCTGTTTCTTGGCCCGCTGCTGAGGC   | 25164492  | 1:25164492  | R | TSS1500                  | 0.38990 | 4.20E-04 |
| cg13461622 |        | 1  | CGCTTCTGTTGAGAATTTGTGGCTAGACATTCTGTGGACCGGAATCC     | 25163972  | 1:25163972  | R | 1stExon;5'UTR            | 0.27998 | 2.20E-09 |
| cg03961551 |        | 1  | TTTCCCAGTCAGCAGGATGGGCACTGCAGATGTGTGCTGCATGCCAGCG   | 25124317  | 1:25124317  | R | Body                     | 0.29300 | 4.30E-06 |
| cg14054883 | SYK    | 9  | AAAACCTTTTCCTTGTTTCATTGAGGAATGAGACTGTGTTAGGCTGTCACG | 92659288  | 9:92659288  | R | Body                     | 0.26680 | 1.60E-08 |
| cg20059012 | RARG   | 12 | CGTGTGCCCTGCGTGGCTGCGGGGGCGGTTTTGGAAAGTGTGTGTTTCG   | 51899421  | 12:51899421 | F | Body                     | 0.27935 | 7.70E-07 |
