# Supplementary material for: The human blood DNA methylome identifies crucial role of β-catenin in the pathogenesis of Kawasaki disease
Source: PubMed Central journal article supplement (PMC6033340; doi:10.18632/oncotarget.25305), 2018-06-19
Supplement: oncotarget-09-28337-s003.pdf [file oncotarget-09-28337-s003.pdf]

**Supplementary Table 3.** Probe data of 11 targeted genes with hypermethylated CpG loci selected using network-based enrichment analysis predesigned for RNA-Seq.

| Gene Name | Transcript ID | Build ID | Chr   | Start Position | End Position | ULSO Sequence               | ULSO Hits | DLSO Sequence                | DLSO Hits | Probe Strand |
|-----------|---------------|----------|-------|----------------|--------------|-----------------------------|-----------|------------------------------|-----------|--------------|
| RUNX3     | NM_001031680  | hg19     | chr1  | 25256102       | 25254180     | CAAGACGCTGCCCGTCGCCTTCAA    | 1         | GACGTGCCGGATGGTACGGTGGTGACT  | 1         | MINUS        |
| ETS1      | NM_001143820  | hg19     | chr11 | 128333436      | 128332437    | GGCTGGGAATTCAAACCTTCTGACC   | 1         | AGATGGGAAAGAGGAAAAACAAACC    | 3         | MINUS        |
| ETS1      | NM_001143820  | hg19     | chr11 | 128426220      | 128360447    | GGAAGTTCCTACTGGTCTTGAACACTG | 1         | TATGGAATGTGCAGATGTCCCACT     | 3         | MINUS        |
| CDC25B    | NM_004358     | hg19     | chr20 | 3777344        | 3778339      | ACCCAGACCATGCACGACCTCG      | 1         | CAGCCGCTGACGCACCTATCCCTGT    | 1         | PLUS         |
| PDCD1     | NM_005018     | hg19     | chr2  | 242800987      | 242800924    | CAGATCCCACAGGCGCCCTGGCCAGT  | 1         | GTGCTACAACTGGGCTGGCGGCCAGGAT | 1         | MINUS        |
| CDC25B    | NM_021872     | hg19     | chr20 | 3781120        | 3781655      | CCATCAGACGCTTCCAGTCTATGC    | 2         | TTC AAGATGCCATGGAAGCCACACAT  | 1         | PLUS         |
| CDC25B    | NM_021873     | hg19     | chr20 | 3785295        | 3785492      | GGCGGCTACAAGGAGTTCTCCCTCA   | 1         | ACTTCTGTGAACCCAGGACTACC      | 1         | PLUS         |
| NFATC1    | NM_172387     | hg19     | chr18 | 77246905       | 77287566     | CTGAAGAGTTGGACCAGTTGTACCT   | 1         | AATGACCTCTCCAGCAGGAGCA       | 8         | PLUS         |
| NFATC1    | NM_172388     | hg19     | chr18 | 77156327       | 77193619     | GGCACCATGAAGTCAGCGGAGGAA    | 2         | CCTGGACTGGCAGCTGCCGTCCCACT   | 1         | PLUS         |
| NFATC1    | NM_172389     | hg19     | chr18 | 77193711       | 77208804     | GTCGGCCGGAGGACACCCCATCGT    | 1         | CTGCATGGCTACTTGAGAAATGA      | 4         | PLUS         |
| CTNNB1    | NM_001098210  | hg19     | chr3  | 41241134       | 41265540     | CGCGGCGGGAGGAGCCTGTCCCCTGA  | 1         | GGTATTTGAAGTATACCATACTGTTT   | 1         | PLUS         |
| CD247     | NM_198053     | hg19     | chr1  | 167487681      | 167409965    | ACCGGCCATCCTGCAGGCACAGTT    | 2         | GCCTGCTGGATCCCAAACCTCTGCTA   | 2         | MINUS        |
| CD247     | NM_198053     | hg19     | chr1  | 167407845      | 167404646    | AAGAGACGTGGCCGGACCCTGAGAT   | 1         | AGAGAAGGAAGAACCCTCAGGAAGG    | 5         | MINUS        |
| RARG      | NM_000966     | hg19     | chr12 | 53606893       | 53605606     | GACCTCCGGGCATCAGCACTAA      | 1         | TACTCTGAAGATGGAGATCCAGGCC    | 1         | MINUS        |
| RARG      | NM_001243731  | hg19     | chr12 | 53624980       | 53609190     | GAAGCCAGTCTCTGCAGCGGCCA     | 3         | TTTCGCCGAAGCATCCAGAAGAA      | 5         | MINUS        |
| RARG      | NM_000966     | hg19     | chr12 | 53625786       | 53624976     | CGCCGCTCCCTTCCCCTCCCACTC    | 9         | AACCTGACCCAGTATGTAGAAGC      | 1         | MINUS        |
| SYK       | NM_003177     | hg19     | chr9  | 93650877       | 93657848     | GTACGATCTCATGAATCTGTGCTGGA  | 1         | GATTCGCAGCAGTGGAACTGCG       | 6         | PLUS         |

|       |                |      |       |           |           |                             |    |                                |    |       |
|-------|----------------|------|-------|-----------|-----------|-----------------------------|----|--------------------------------|----|-------|
| SYK   | NM_001174167   | hg19 | chr9  | 93589831  | 93606182  | CCAGATCTGCGTTTGAATCCAGGAAA  | 1  | TGCCCTCCGGCCCCTGAAGCAT         | 9  | PLUS  |
| SYK   | NM_001174168   | hg19 | chr9  | 93627351  | 93636514  | GTCCACAACCTCCAGGTTCCCAT     | 5  | CCTCCCCTGCCCAAGGGAACCGCAAGA    | 1  | PLUS  |
| GAPDH | NM_002046      | hg19 | chr12 | 6647132   | 6647310   | TCAACGACCACTTTGTCAAGCTCA    | 37 | CAGCAACAGGGTGGTGGACCTCA        | 46 | PLUS  |
| LTA   | NM_001159740_2 | hg19 | chr6  | 31540041  | 31540542  | GGGACCTGAGCGTCCGGGCCCA      | 6  | CCATGACACCACCTGAACGTCTCTT      | 1  | PLUS  |
| LTA   | NM_000595_3    | hg19 | chr6  | 31541751  | 31541808  | TGGGGCCTAGATCCACACACAGAGGAA | 1  | GCACATGGAGGAGCTTGGGGATGA       | 1  | PLUS  |
| BTLA  | NM_181780      | hg19 | chr3  | 112190093 | 112188618 | TTTCTGCCTGTTCTGCTGCCTGAGAA  | 2  | AAATGAACTCTCTGACACAGCAGGAAG    | 1  | MINUS |
| BTLA  | NM_181780      | hg19 | chr3  | 112218150 | 112198578 | TAATCCCATATCTGGACATCTGGAACA | 1  | CATGTGATGTACAGCTTTATATAAAGAGAC | 1  | MINUS |

ULSO: upstream locus-specific oligonucleotides; DLSO: downstream locus-specific oligonucleotides.
